# Supplementary material
Source: publisher site journal article supplement (https://www.dovepress.com/article/218542)
Supplement: Supplementary file 1 [file get_supplementary_file.php]

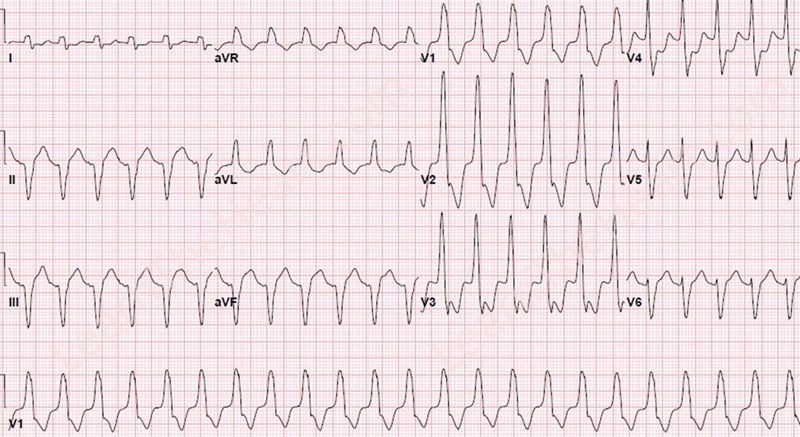


Terraces 1 (Easy)


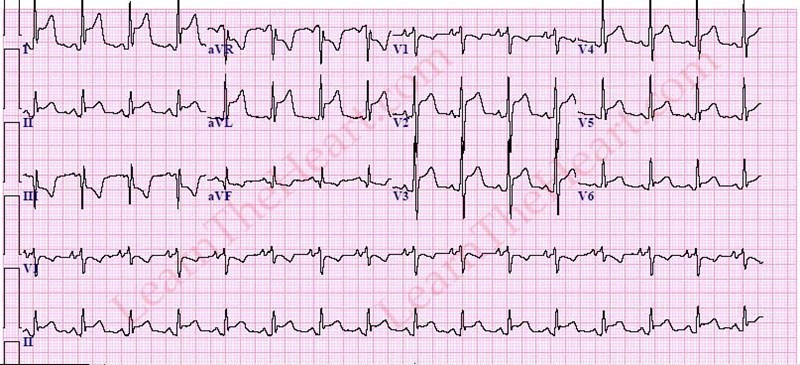


Terraces 2 (Difficult)


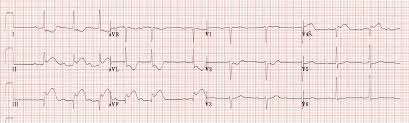


Terraces 3 (Middle)


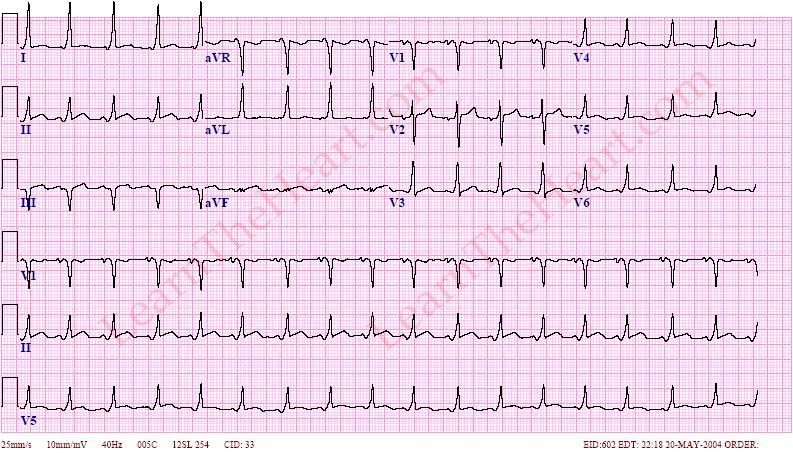


Terraces 4 (Difficult)


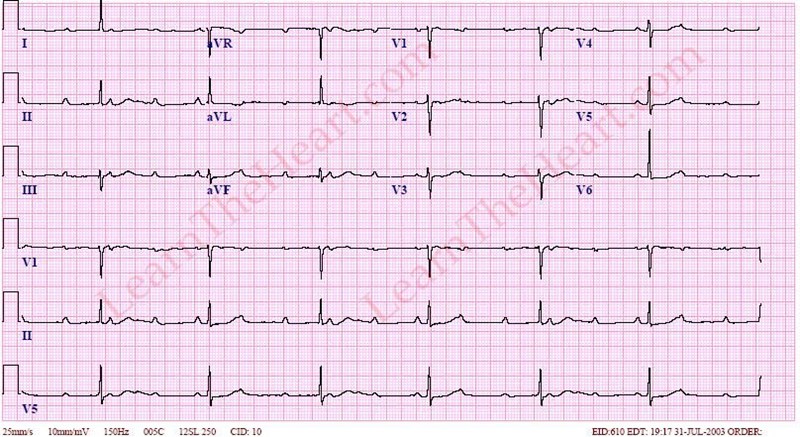


Terraces 5 (Middle)


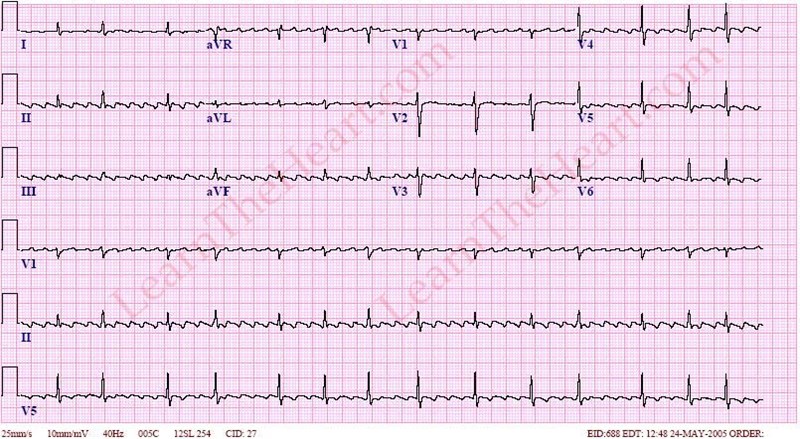


Terraces 6 (Middle)


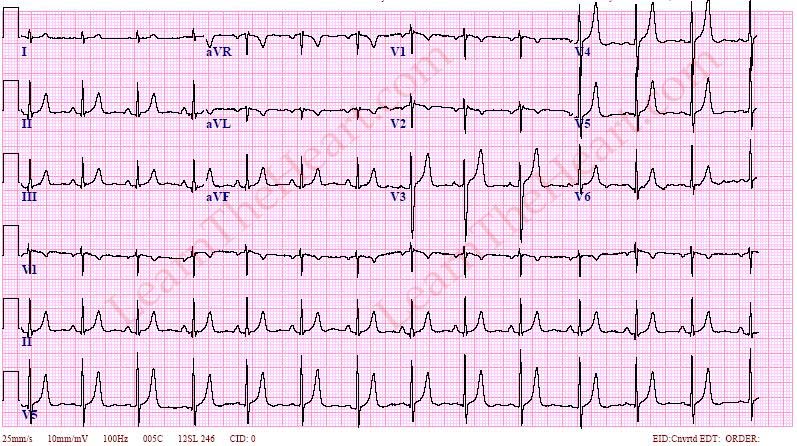


Terraces 7 (Easy)


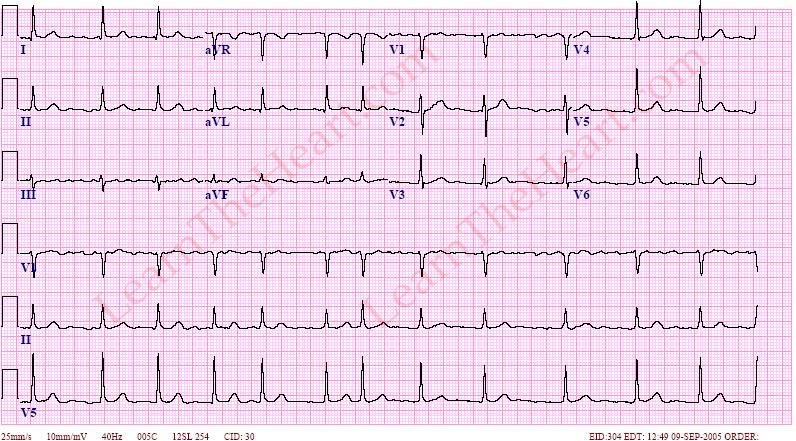


Terraces 8 (Easy)


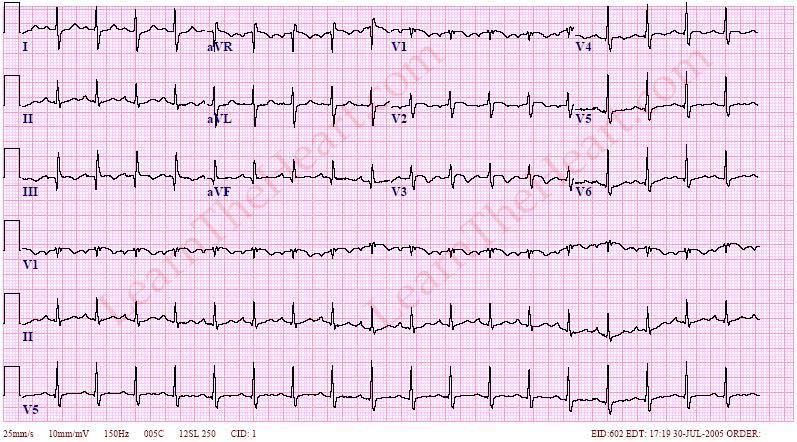


Terraces 9 (Difficult)

**Supplementary Figure 1. Nine different ECG terraces verified by Department of Cardiology professors at Mashhad University of Medical Sciences**
